# Supplementary material for: Optimization of proximity ligation assay (PLA) for detection of protein interactions and fusion proteins in non-adherent cells: application to pre-B lymphocytes
Source: PubMed Central journal article supplement (PMC5520345; doi:10.1186/s13039-017-0328-2), 2017-07-20
Supplement: 13039_2017_328_MOESM1_ESM.pdf [file 13039_2017_328_MOESM1_ESM.pdf]

# Supplemental figure 1

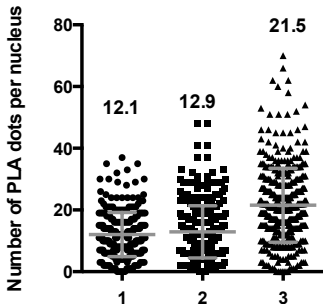

Mouse and rabbit antibodies:

- 1: ETV6 ab54705 and RUNX1 ab23980
- 2: ETV6 sc166835 and RUNX1 ab23980
- ▲ 3: RUNX1 ab110035 and ETV6 sc11382
